# Supplementary material for: The nuclear hormone receptor NHR-86 controls anti-pathogen responses in C. elegans
Source: PLoS Genet. 2019 Jan 22;15(1):e1007935. doi: 10.1371/journal.pgen.1007935 (PMC6358101; doi:10.1371/journal.pgen.1007935)
Supplement: S4 Table — (A) Data for Fig 4A. (B) Data for Fig 5B. (C) Data for S1C Fig. (D) Data for S1D Fig. (XLSX) [file pgen.1007935.s009.xlsx]

## Sheet: S4A
			Control				R24								Control				R24
	Genotype		n		Mean lifespan (hours)		n		Mean survival (hours)		% lifespan extension conferred by R24 (% of control)		Genotype		n		Mean lifespan (hours)		n		Mean survival (hours)		% lifespan extension conferred by R24 (% of control)		P-value comparing R24 treated conditions
	wild-type		127		65.15±2.00		128		91.93±1.17		141.105		nhr-86(tm2590)		73		66.94±2.34		66		69.26±2.54		103.466		<0.001
	wild-type		168		65.38±1.00		168		77.43±0.91		118.431		nhr-86(tm2590)		106		64.56±1.48		112		63.79±1.61		98.8073		<0.001
	wild-type		156		59.74±0.91		134		87.51±1.56		146.485		nhr-86(tm2590)		100		55.96±1.09		123		66.26±1.37		118.406		<0.001
	wild-type		156		59.74±0.91		134		87.51±1.56		146.485		nhr-86(ums12)		101		57.66±1.33		92		64.02±1.34		111.03		<0.001
	wild-type		80		60.65±1.52		97		81.14±1.21		133.784		nhr-86(ums12)		83		63.45±1.48		81		73.99±1.88		116.612		0.026
	wild-type		104		63.25±1.39		91		78.11±1.39		123.494		nhr-86(ums12)		90		65.84±1.68		82		71.07±1.85		107.943		0.02

## Sheet: S4B
			Control				R24								Control				R24
	Genotype		n		Mean lifespan (hours)		n		Mean survival (hours)		% lifespan extension conferred by R24 (% of control)		Genotype		n		Mean lifespan (hours)		n		Mean survival (hours)		% lifespan extension conferred by R24 (% of control)		P-value comparing R24 treated conditions
	wild-type		112		62.53±1.58		144		80.42±1.06		128.61		nhr-86(tm2590)		52		54.77±2.07		51		58.44±1.59		106.701		<0.001
	wild-type		126		67.48±1.18		116		79.88±0.93		118.376		nhr-86(tm2590)		92		59.98±1.55		131		72.58±1.15		121.007		<0.001
	wild-type		103		64.05±1.37		118		80.73±1.23		126.042		nhr-86(tm2590)		98		64.44±1.46		96		65.48±1.66		101.614		<0.001
	wild-type		112		62.53±1.58		144		80.42±1.06		128.61		pmk-1(km25)		66		32.66±0.90		73		37.16±1.06		113.778		<0.001
	wild-type		126		67.48±1.18		116		79.88±0.93		118.376		pmk-1(km25)		106		29.45±0.76		139		37.52±0.65		127.402		<0.001
	wild-type		103		64.05±1.37		118		80.73±1.23		126.042		pmk-1(km25)		121		30.04±0.79		109		40.75±1.18		135.652		<0.001
	pmk-1(km25)		66		32.66±0.90		73		37.16±1.06		113.778		nhr-86(tm2590);pmk-1(km25)		63		31.55±1.79		62		31.09±1.18		98.6984		<0.001
	pmk-1(km25)		106		29.45±0.76		139		37.52±0.65		127.402		nhr-86(tm2590);pmk-1(km25)		92		30.18±0.82		104		34.15±0.93		113.154		0.016
	pmk-1(km25)		121		30.04±0.79		109		40.75±1.18		135.652		nhr-86(tm2590);pmk-1(km25)		90		29.79±1.00		78		26.85±1.04		90.1309		<0.001

## Sheet: S4C
			PA14								PA14
	Genotype		n		Mean survival (hours)		P-value		Genotype		n		Mean survival (hours)		P-value
	L4440		187		62.47±1.04		-		irg-4(RNAi)		256		59.52±0.94		0.0394
	L4440		111		51.96±1.54		-		irg-4(RNAi)		114		46.16±1.39		0.0061
	L4440		126		76.23±1.54				irg-4(RNAi)		117		65.62±1.41		9.9e-08
	L4440		187		62.47±1.04		-		irg-5(RNAi)		225		54.42±0.88		5.5e-09
	L4440		111		51.96±1.54		-		irg-5(RNAi)		116		47.69±1.48		0.0626
	L4440		137		67.58±2.12				irg-5(RNAi)		148		58.46±2.00		0.0095
	L4440		187		62.47±1.04		-		irg-6(RNAi)		186		54.4±0.97		2.8e-08
	L4440		111		51.96±1.54		-		irg-6(RNAi)		139		42.7±1.31		1.3e-05
	L4440		191		73.98±1.28		-		irg-6(RNAi)		224		69.46±1.28		0.0415

## Sheet: S4D
			OP50								OP50
	Genotype		n		Mean lifespan (days)		P-value		Genotype		n		Mean lifespan (days)		P-value
	L4440		140		9.43±0.15		-		irg-4(RNAi)		113		10.70±0.17		3.3e-07
	L4440		128		10.16±0.15		-		irg-4(RNAi)		162		10.94±0.17		0.0004
	L4440		345		12.02±0.18		-		irg-4(RNAi)		277		11.52±0.19		0.0441
	L4440		140		9.43±0.15		-		irg-5(RNAi)		123		11.65±0.21		0
	L4440		128		10.16±0.15		-		irg-5(RNAi)		155		11.25±0.19		5.1e-06
	L4440		345		12.02±0.18		-		irg-5(RNAi)		272		14.15±0.17		0
	L4440		140		9.43±0.15		-		irg-6(RNAi)		154		10.75±0.22		2.1e-07
	L4440		128		10.16±0.15		-		irg-6(RNAi)		136		11.59±0.22		1.6e-08
	L4440		345		12.02±0.18		-		irg-6(RNAi)		364		13.69±0.14		1.8e-08
